# Supplementary material
Source: MDPI journal article supplement (https://www.mdpi.com/2227-9717/11/9/2781)
Supplement: s1 [file s1]

## **Response of nitrogen removal performance and microbial distribution to seasonal shock nutrients load in a lakeshore multi-cell constructed wetland**

Jing Yuan <sup>1,2</sup>, Bin Wang <sup>1,2</sup>, Zeying Hou <sup>1,2</sup>, Jiayu Peng <sup>1,2</sup>, Dan Li <sup>3</sup> and Zhaosheng Chu <sup>1,2,\*</sup>

**Figure S1.** Rainfall, evaporation and influent amount in 2021.

**Figure S2.** Photographs of the cells in the lakeshore MCW.

**Figure S3.** Comparisons of EP in wet and dry seasons.

**Figure S4.** The nitrogen concentrations of the influent along the flowing rate.

**Figure S5.** The visualization of beta diversity and analysis of similarities (ANOSIM).

**Figure S6.** Relative abundances of the top 100 genera in various sediments of cells.

**Table S1.** Basic information of the multi-cell constructed wetlands.

**Table S2.** Land use in the catchment around the lakeshore MCW.

**Table S3.** Monthly nitrogen concentration and removal performance of the lakeshore MCW.

**Table S4.** Results of one-way ANOVA for the effects of various seasons or treatment process on the nitrogen removal efficiency of the lakeshore MCWs.

**Table S5.** Sequencing statistics for the sediment samples of lakeshore MCW.

**Table S6.** Microbial diversity indices for the cells of lakeshore MCW.

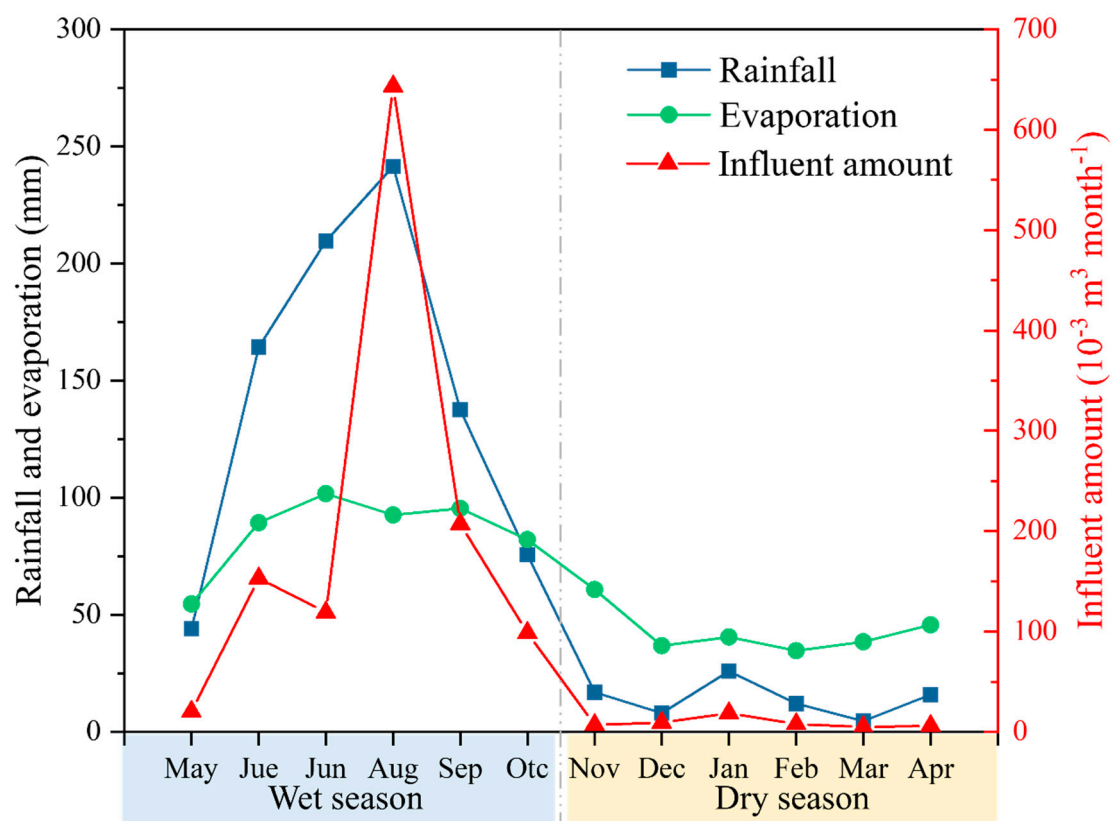

**Figure S1.** Rainfall, evaporation and influent amount in 2021.

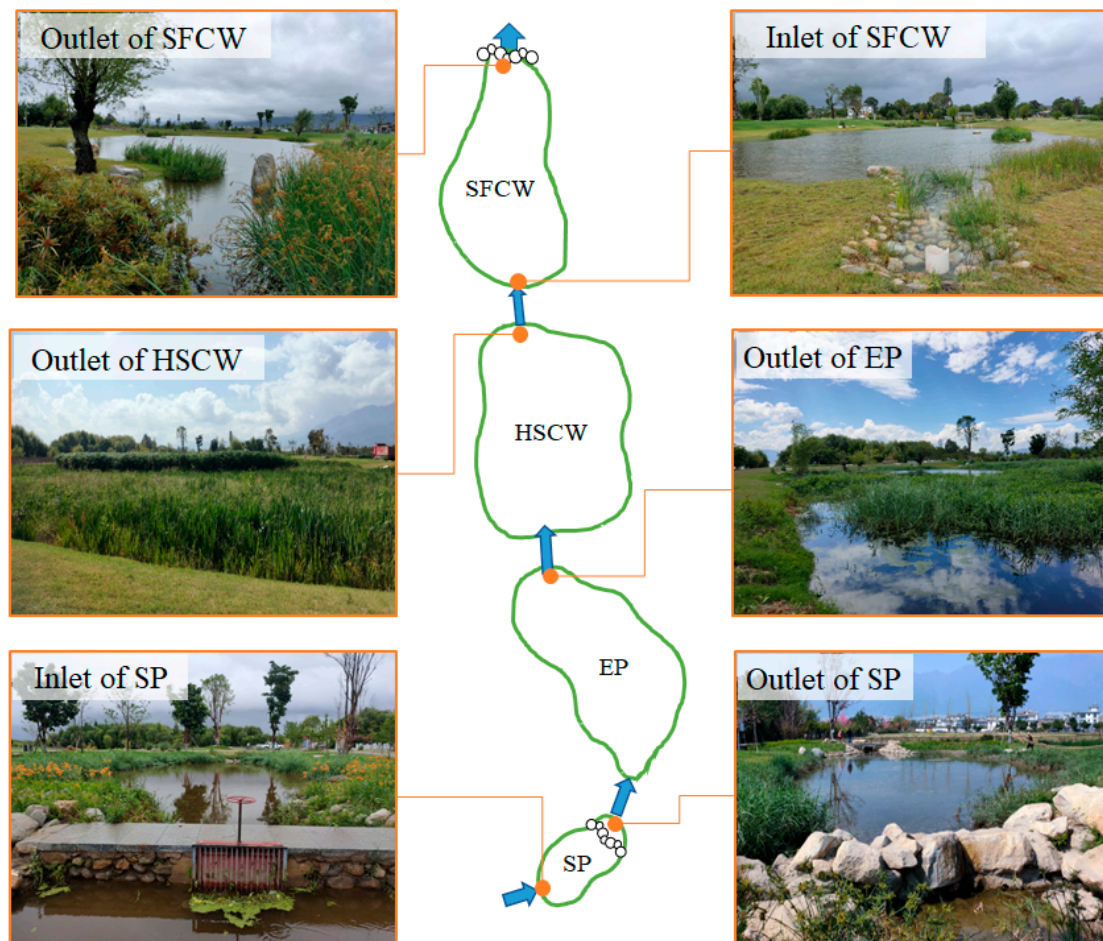

**Figure S2.** Photographs of the cells in the lakeshore MCW. SP: storage pod; EP: ecological oxidation pond; HSCW: horizontal subsurface flow constructed wetland; SFCW: surface flow constructed wetland.

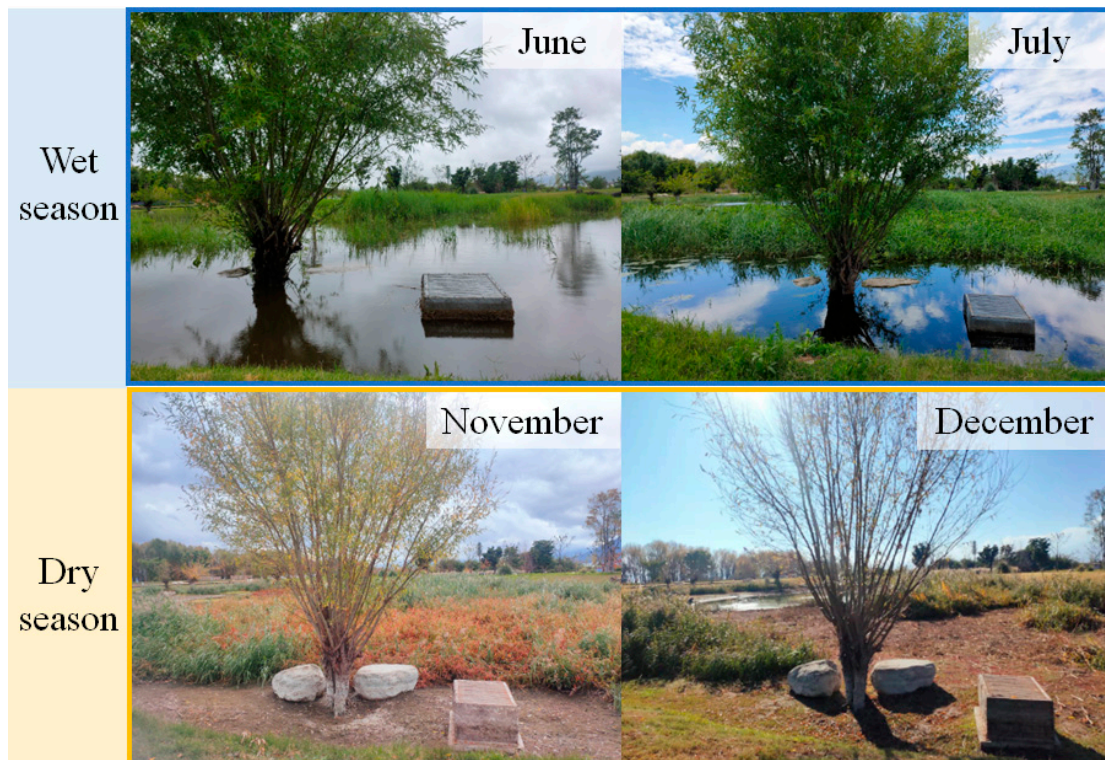

**Figure S3.** Comparisons of the ecological oxidation pond (EP) in wet and dry seasons.

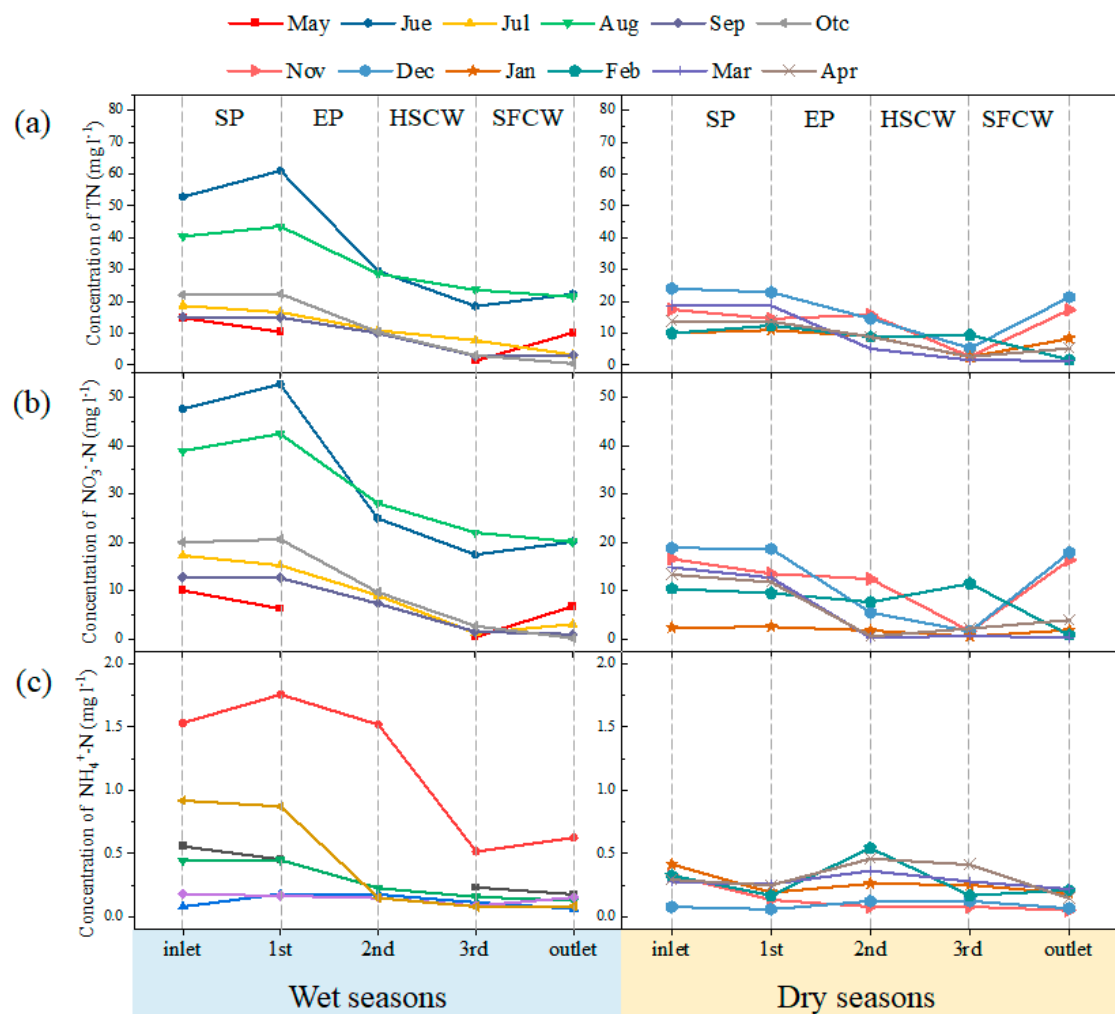

**Figure S4.** The nitrogen concentrations of the influent along the flowing rate. **(a)** TN; **(b)** NO<sub>3</sub><sup>-</sup>-N; **(c)** NH<sub>4</sub><sup>+</sup>-N. SP: storage pod; EP: ecological oxidation pond; HSCW: horizontal subsurface flow constructed wetland; SFCW: surface flow constructed wetland.

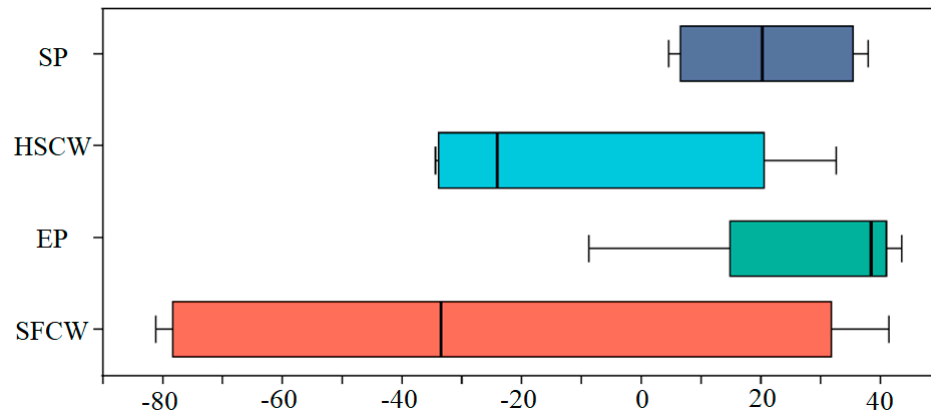

**Figure S5.** The visualization of beta diversity and analysis of similarities (ANOSIM). SP: storage pod; EP: ecological oxidation pond; HSCW: horizontal subsurface flow constructed wetland; SFCW: surface flow constructed wetland.

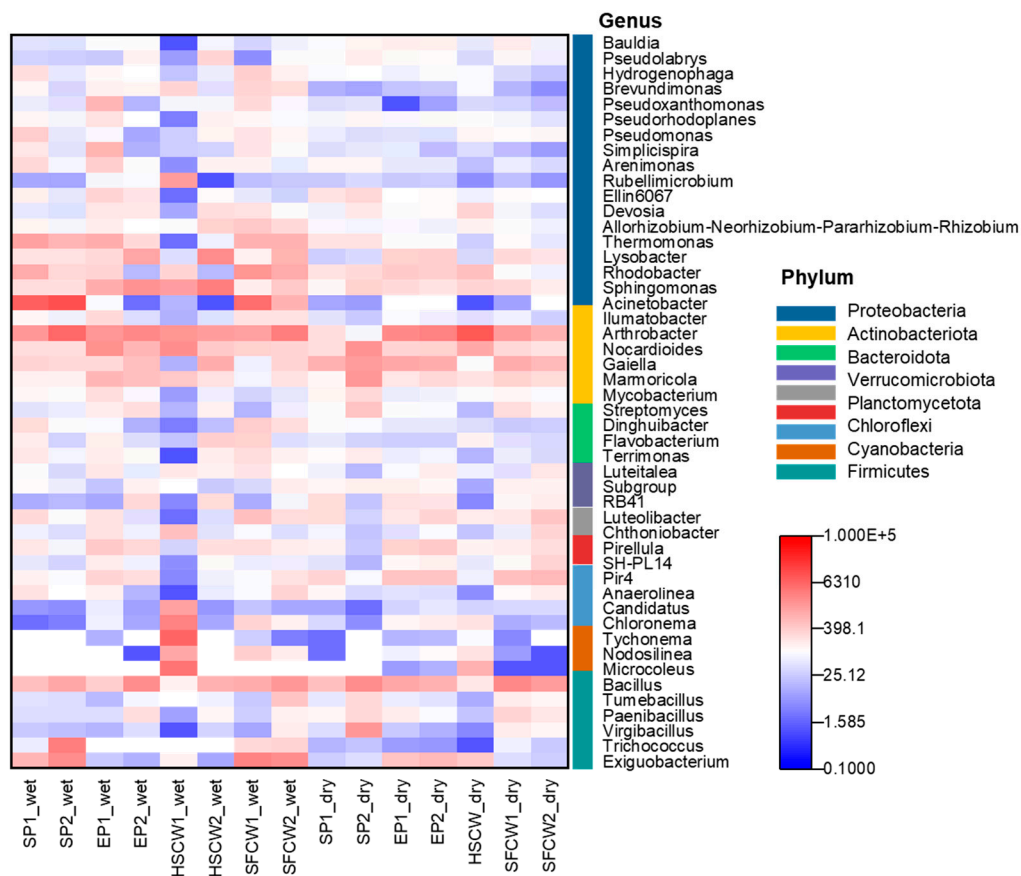

**Figure S6.** Relative abundances of the top 100 genera in various sediments of cells. SP: storage pod; EP: ecological oxidation pond; HSCW: horizontal subsurface flow constructed wetland; SFCW: surface flow constructed wetland.

**Table S1.** Basic information of the multi-cell constructed wetlands.

| Cell   | Area<br>(m <sup>2</sup> ) | Maximum<br>design water<br>depth (m) | Plant configuration                                                                                                                   | Plant<br>coverage<br>(%) |
|--------|---------------------------|--------------------------------------|---------------------------------------------------------------------------------------------------------------------------------------|--------------------------|
| SP *   | 356±23                    | 1                                    | <i>Phragmites australis</i> , <i>Cyperus</i><br><i>involucratus</i> , <i>Canna indica</i> var. <i>flava</i>                           | 10±5                     |
| EP *   | 2037±120                  | 1                                    | <i>Phragmites australis</i>                                                                                                           | 60±5                     |
| HSCW * | 3478±34                   | 0.8                                  | <i>Iris pseudacorus</i> L., <i>Cyperus</i><br><i>involucratus</i>                                                                     | 95±5                     |
| SFCW * | 2411±48                   | 0.35                                 | <i>Juncus effusus</i> , <i>Canna indica</i> , <i>Cyperus</i><br><i>involucratus</i> , <i>Myriophyllum aquaticum</i><br>(Vell.) Verdc. | 90±5                     |

\* SP: storage pod; EP: ecological oxidation pond; HSCW: horizontal subsurface flow constructed wetland; SFCW: surface flow constructed wetland.



**Table S2.** Land use in the catchment around the lakeshore MCW.

| Agricultural<br>land (%) | Residential<br>land (%) | Woodland<br>(%) | Water<br>(%) | Other<br>(%) |
|--------------------------|-------------------------|-----------------|--------------|--------------|
| 65.07                    | 22.48                   | 11.21           | 0.61         | 0.63         |

**Table S3.** Monthly nitrogen concentration and removal performance of the lakeshore MCW.

|      |                                 | $C_{in}$<br>(mg l <sup>-1</sup> ) | $C_{out}$<br>(mg l <sup>-1</sup> ) | RE *<br>(%) | MRR *<br>(mg m <sup>-2</sup> day <sup>-1</sup> ) | MRR <sub>v</sub> *<br>(mg m <sup>-3</sup> day <sup>-1</sup> ) | MLR *<br>(mg m <sup>-2</sup> day <sup>-1</sup> ) | HRT *<br>(day) | HLR *<br>(m day <sup>-1</sup> ) |
|------|---------------------------------|-----------------------------------|------------------------------------|-------------|--------------------------------------------------|---------------------------------------------------------------|--------------------------------------------------|----------------|---------------------------------|
| Jar. | TN                              | 10.04±0.50                        | 8.34±0.42                          | 17.42       | 131.90                                           | 181.66                                                        | 22.71                                            | 9.63           | 0.08                            |
|      | NH <sub>4</sub> <sup>+</sup> -N | 0.04±0.02                         | 0.18±0.01                          | 56.10       | 17.56                                            | 24.18                                                         | 0.94                                             |                |                                 |
|      | NO <sub>3</sub> <sup>-</sup> -N | 2.40±0.12                         | 1.89±0.09                          | 21.78       | 39.38                                            | 54.23                                                         | 5.42                                             |                |                                 |
| Feb. | TN                              | 10.00±0.50                        | 1.65±0.08                          | 83.90       | 263.68                                           | 363.17                                                        | 9.43                                             | 23.11          | 0.03                            |
|      | NH <sub>4</sub> <sup>+</sup> -N | 0.33±0.02                         | 0.21±0.01                          | 36.88       | 3.79                                             | 5.22                                                          | 0.31                                             |                |                                 |
|      | NO <sub>3</sub> <sup>-</sup> -N | 10.37±0.52                        | 0.80±0.04                          | 92.48       | 301.33                                           | 415.02                                                        | 9.77                                             |                |                                 |
| Mar. | TN                              | 18.59±0.93                        | 1.35±0.07                          | 93.19       | 328.23                                           | 452.06                                                        | 10.57                                            | 38.32          | 0.02                            |
|      | NH <sub>4</sub> <sup>+</sup> -N | 0.27±0.01                         | 0.22±0.01                          | 23.99       | 1.24                                             | 1.71                                                          | 0.16                                             |                |                                 |
|      | NO <sub>3</sub> <sup>-</sup> -N | 14.83±0.74                        | 0.29±0.01                          | 98.14       | 275.76                                           | 379.80                                                        | 8.43                                             |                |                                 |
| Apr. | TN                              | 13.71±0.69                        | 5.23±0.26                          | 63.42       | 208.48                                           | 287.14                                                        | 9.86                                             | 30.28          | 0.02                            |
|      | NH <sub>4</sub> <sup>+</sup> -N | 0.29±0.01                         | 0.15±0.01                          | 52.23       | 3.68                                             | 5.07                                                          | 0.21                                             |                |                                 |
|      | NO <sub>3</sub> <sup>-</sup> -N | 13.30±0.67                        | 3.95±0.20                          | 71.51       | 228.14                                           | 314.22                                                        | 9.57                                             |                |                                 |
| May  | TN                              | 14.75±0.74                        | 10.19±0.51                         | 31.21       | 376.95                                           | 519.17                                                        | 36.23                                            | 8.87           | 0.08                            |
|      | NH <sub>4</sub> <sup>+</sup> -N | 0.56±0.03                         | 0.18±0.01                          | 68.26       | 31.16                                            | 42.92                                                         | 1.37                                             |                |                                 |
|      | NO <sub>3</sub> <sup>-</sup> -N | 10.04±0.50                        | 6.79±0.34                          | 32.66       | 268.49                                           | 369.79                                                        | 24.66                                            |                |                                 |

|      |                                 | $c_{in}$<br>(mg l <sup>-1</sup> ) | $c_{out}$<br>(mg l <sup>-1</sup> ) | RE *<br>(%) | MRR *<br>(mg m <sup>-2</sup> day <sup>-1</sup> ) | MRR <sub>V</sub> *<br>(mg m <sup>-3</sup> day <sup>-1</sup> ) | MLR *<br>(mg m <sup>-2</sup> day <sup>-1</sup> ) | HRT *<br>(day) | HLR *<br>(m day <sup>-1</sup> ) |
|------|---------------------------------|-----------------------------------|------------------------------------|-------------|--------------------------------------------------|---------------------------------------------------------------|--------------------------------------------------|----------------|---------------------------------|
| Jun. | TN                              | 52.90±2.65                        | 22.29±1.11                         | 57.69       | 18886.75                                         | 26012.64                                                      | 982.10                                           | 1.17           | 0.62                            |
|      | NH <sub>4</sub> <sup>+</sup> -N | 1.53±0.08                         | 0.63±0.03                          | 59.03       | 560.37                                           | 771.79                                                        | 28.48                                            |                |                                 |
|      | NO <sub>3</sub> <sup>-</sup> -N | 47.57±2.38                        | 20.08±1.00                         | 57.60       | 16954.59                                         | 23351.47                                                      | 882.99                                           |                |                                 |
| Jul. | TN                              | 18.63±0.93                        | 3.21±0.16                          | 82.62       | 7398.74                                          | 10190.26                                                      | 268.64                                           | 1.51           | 0.48                            |
|      | NH <sub>4</sub> <sup>+</sup> -N | 0.08±0.01                         | 0.06±0.01                          | 19.51       | 7.52                                             | 10.36                                                         | 1.16                                             |                |                                 |
|      | NO <sub>3</sub> <sup>-</sup> -N | 17.27±0.86                        | 3.06±0.15                          | 82.13       | 6819.07                                          | 9391.87                                                       | 249.08                                           |                |                                 |
| Aug. | TN                              | 40.41±2.02                        | 21.45±1.07                         | 46.81       | 49175.12                                         | 67728.67                                                      | 3151.33                                          | 0.28           | 2.60                            |
|      | NH <sub>4</sub> <sup>+</sup> -N | 0.45±0.02                         | 0.13±0.01                          | 70.85       | 819.60                                           | 1128.84                                                       | 34.70                                            |                |                                 |
|      | NO <sub>3</sub> <sup>-</sup> -N | 38.91±1.95                        | 20.12±1.01                         | 48.20       | 48739.36                                         | 67128.49                                                      | 3033.86                                          |                |                                 |
| Sep. | TN                              | 15.05±0.75                        | 3.10±0.16                          | 79.34       | 9988.12                                          | 13756.59                                                      | 377.68                                           | 0.87           | 0.84                            |
|      | NH <sub>4</sub> <sup>+</sup> -N | 0.18±0.01                         | 0.15±0.01                          | 13.60       | 20.39                                            | 28.09                                                         | 4.50                                             |                |                                 |
|      | NO <sub>3</sub> <sup>-</sup> -N | 12.80±0.64                        | 1.02±0.05                          | 92.02       | 9858.04                                          | 13577.44                                                      | 321.37                                           |                |                                 |
| Oct. | TN                              | 22.09±1.10                        | 0.43±0.02                          | 98.03       | 8623.04                                          | 11876.48                                                      | 263.88                                           | 1.82           | 0.40                            |
|      | NH <sub>4</sub> <sup>+</sup> -N | 0.92±0.05                         | 0.09±0.01                          | 90.58       | 331.49                                           | 456.57                                                        | 10.98                                            |                |                                 |
|      | NO <sub>3</sub> <sup>-</sup> -N | 20.02±1.00                        | 0.19±0.89                          | 99.03       | 78393.69                                         | 10871.95                                                      | 239.12                                           |                |                                 |
| Nov. | TN                              | 17.45±0.87                        | 17.34±0.87                         | 5.80        | 28.25                                            | 38.90                                                         | 14.60                                            | 26.02          | 0.03                            |

|      | $c_{in}$<br>(mg l <sup>-1</sup> ) | $c_{out}$<br>(mg l <sup>-1</sup> ) | RE *       | MRR *                                   | MRR <sub>V</sub> *                      | MLR *                                   | HRT * | HLR *                  |
|------|-----------------------------------|------------------------------------|------------|-----------------------------------------|-----------------------------------------|-----------------------------------------|-------|------------------------|
|      |                                   |                                    | (%)        | (mg m <sup>-2</sup> day <sup>-1</sup> ) | (mg m <sup>-3</sup> day <sup>-1</sup> ) | (mg m <sup>-2</sup> day <sup>-1</sup> ) | (day) | (m day <sup>-1</sup> ) |
|      | NH <sub>4</sub> <sup>+</sup> -N   | 0.33±0.02                          | 0.05±0.01  | 85.49                                   | 7.90                                    | 10.88                                   | 0.28  |                        |
|      | NO <sub>3</sub> <sup>-</sup> -N   | 16.58±0.83                         | 16.36±0.82 | 6.53                                    | 30.19                                   | 41.59                                   | 13.88 |                        |
| Dec. | TN                                | 24.05±1.20                         | 21.34±1.07 | 13.57                                   | 119.67                                  | 164.82                                  | 26.45 | 19.81                  |
|      | NH <sub>4</sub> <sup>+</sup> -N   | 0.08±0.01                          | 0.07±0.01  | 15.97                                   | 0.46                                    | 0.64                                    | 0.09  | 0.04                   |
|      | NO <sub>3</sub> <sup>-</sup> -N   | 18.83±0.94                         | 17.89±0.89 | 7.49                                    | 51.68                                   | 71.18                                   | 20.70 |                        |

Data are presented as means ± standard deviation (S.D.) with n = 3.

\* RE: removal rate; MRR: mass removal rate per square meter; MRR<sub>V</sub>: mass removal rate per cubic meter; HRT: hydraulic residence time; HLR: hydraulic loading rate.

**Table S4.** Results of one-way ANOVA for the effects of various seasons or treatment

processes on the nitrogen removal efficiency of the lakeshore MCWs.

|           |      | TN       |       | NH <sub>4</sub> <sup>+</sup> -N |       | NO <sub>3</sub> <sup>-</sup> -N |       |
|-----------|------|----------|-------|---------------------------------|-------|---------------------------------|-------|
| Factors   |      | F        | P     | F                               | P     | F                               | P     |
| Seasons   | Jan. | 1449.711 | 0.000 | 1402.050                        | 0.000 | 1481.153                        | 0.000 |
|           | Feb. | 1284.953 | 0.000 | 1487.206                        | 0.000 | 1427.115                        | 0.000 |
|           | Mar. | 618.934  | 0.000 | 1572.705                        | 0.000 | 1568.448                        | 0.000 |
|           | Apr. | 1593.140 | 0.000 | 1598.175                        | 0.000 | 1332.964                        | 0.000 |
|           | May  | 1329.725 | 0.000 | 45.59514                        | 0.000 | 1276.717                        | 0.000 |
|           | Jun. | 190.325  | 0.000 | 1456.248                        | 0.000 | 1284.004                        | 0.000 |
|           | Jul. | 106.056  | 0.000 | 1557.289                        | 0.000 | 1598.064                        | 0.000 |
|           | Aug. | 150.828  | 0.000 | 595.6724                        | 0.000 | 918.0054                        | 0.000 |
|           | Sep. | 1022.747 | 0.000 | 1582.264                        | 0.000 | 537.2155                        | 0.000 |
|           | Otc. | 445.375  | 0.000 | 890.2646                        | 0.000 | 489.2385                        | 0.000 |
|           | Nov. | 1185.982 | 0.000 | 441.4404                        | 0.000 | 1301.881                        | 0.000 |
|           | Dec. | 1400.985 | 0.000 | 1563.641                        | 0.000 | 1309.637                        | 0.000 |
| Treatment | SP   | 28.62152 | 0.000 | 1272.254                        | 0.000 | 1063.208                        | 0.000 |
| process   | EP   | 382.0684 | 0.000 | 1221.456                        | 0.000 | 349.2848                        | 0.000 |
|           | HSCW | 266.2212 | 0.000 | 486.0679                        | 0.000 | 1297.086                        | 0.000 |
|           | SFCW | 1004.04  | 0.000 | 1165.174                        | 0.000 | 974.7029                        | 0.000 |

**Table S5.** Sequencing statistics for the sediment samples of lakeshore MCW.

|       | Sample ID | Sequences | Base numbers | Mean        | Min length | Max length | OTUs  | Coverage |
|-------|-----------|-----------|--------------|-------------|------------|------------|-------|----------|
|       |           | numbers   |              | length (bp) | (bp)       | (bp)       |       |          |
| Dry   | SP-1 *    | 70767     | 17906733     | 253         | 204        | 331        | 4916  | 0.9579   |
|       | SP-2      | 72882     | 18440644     | 253         | 204        | 339        | 4218  | 0.9626   |
|       | EP-1 *    | 48612     | 12302162     | 253         | 204        | 307        | 5104  | 0.9566   |
|       | EP-2      | 51390     | 13004609     | 253         | 204        | 331        | 4968  | 0.9577   |
|       | HSCW *    | 45278     | 11456661     | 253         | 204        | 314        | 2569  | 0.9780   |
|       | SFCW-1 *  | 57960     | 14666205     | 253         | 202        | 294        | 5334  | 0.9570   |
|       | SFCW-2    | 60879     | 15405214     | 253         | 202        | 309        | 5241  | 0.9583   |
| Wet   | SP-1      | 109399    | 27678717     | 253         | 201        | 323        | 3691  | 0.9650   |
|       | SP-2      | 77286     | 19553417     | 253         | 207        | 287        | 3075  | 0.9671   |
|       | EP-1      | 111312    | 28164748     | 253         | 200        | 305        | 3063  | 0.9753   |
|       | EP-2      | 107099    | 27103394     | 253         | 202        | 314        | 4118  | 0.9681   |
|       | HSCW-1    | 106466    | 26936039     | 253         | 203        | 315        | 1065  | 0.9906   |
|       | HSCW-2    | 101424    | 25667940     | 253         | 204        | 332        | 3842  | 0.9704   |
|       | SFCW-1    | 102031    | 25816829     | 253         | 204        | 318        | 2940  | 0.9723   |
|       | SFCW-2    | 82136     | 20781991     | 253         | 201        | 301        | 4306  | 0.9632   |
| Total |           | 1204921   | 304885303    | -           | -          | -          | 58450 | -        |

\* SP: storage pod; EP: ecological oxidation pond; HSCW: horizontal subsurface flow constructed wetland; SFCW: surface flow constructed wetland.

**Table S6.** Microbial diversity indices for the cells of lakeshore MCW.

|     | Sample ID | Sobs      | Shannon   | ACE       | Chao1     | Simpson       |
|-----|-----------|-----------|-----------|-----------|-----------|---------------|
| Dry | SP *      | 4567±349  | 6.89±0.24 | 6445±423  | 6353±444  | 0.0049±0.0018 |
|     | EP *      | 5036±68   | 7.08±0.04 | 6985±76   | 6894±51   | 0.0057±0.0010 |
|     | HSCW *    | 2569±128  | 5.34±0.27 | 3627±181  | 3659±183  | 0.0472±0.0024 |
|     | SFCW *    | 5288±47   | 7.29±0.02 | 7071±69   | 6987±89   | 0.0031±0.0006 |
| Wet | SP        | 3591±528  | 5.47±0.63 | 5795±276  | 5283±256  | 0.0328±0.0173 |
|     | EP        | 3383±308  | 6.56±0.17 | 4853±637  | 4761±551  | 0.0062±0.0005 |
|     | HSCW      | 2454±1389 | 5.66±1.06 | 3510±1594 | 3296±1654 | 0.0217±0.0171 |
|     | SFCW      | 3623±683  | 6.18±0.37 | 5594±410  | 5158±739  | 0.0137±0.0036 |

Data are presented as means ± standard deviation (S.D.) with n = 2.

\* SP: storage pod; EP: ecological oxidation pond; HSCW: horizontal subsurface flow constructed wetland; SFCW: surface flow constructed wetland.
